# Supplementary material
Source: PubMed Central journal article supplement (PMC2660299)
Supplement: NIHMS4175-supplement-3.pdf [file NIHMS4175-supplement-3.pdf]

### Supplementary Table 1

Supplementary Table 1. Allele frequency and *P* value for each polymorphism in *TIRAP* genotyped in the UK IPD and Gambian malaria case-control studies.

| Polymorphism                             |            | Population                 |                             |                            |                             |
|------------------------------------------|------------|----------------------------|-----------------------------|----------------------------|-----------------------------|
| Position relative to the start of Exon 1 | dbSNP      | UK                         |                             | Gambian                    |                             |
|                                          |            | Minor allele frequency (%) | <i>P</i> value <sup>a</sup> | Minor allele frequency (%) | <i>P</i> value <sup>a</sup> |
| -80708                                   | rs480153   | 18.8                       | 0.129                       | 12.7                       | 0.347                       |
| -68168                                   | rs588361   | 43.0                       | 1.000                       | 41.7                       | 0.974                       |
| -52070                                   | rs618176   | 18.1                       | 0.477                       | 7.5                        | 0.136                       |
| -29144                                   | rs670154   | 43.0                       | <b>0.039</b>                | 47.0                       | 0.999                       |
| -23852                                   | rs631023   | 27.9                       | 0.135                       | 34.7                       | 0.391                       |
| -18304                                   | rs638766   | 24.8                       | 0.864                       | 46.6                       | 0.711                       |
| -12534                                   | rs478309   | 25.3                       | 0.463                       | 46.5                       | 0.394                       |
| -5289                                    | rs594318   | 21.3                       | 0.867                       | 11.1                       | 0.636                       |
| -4570                                    | rs591163   | 24.5                       | 0.703                       | 12.3                       | 0.983                       |
| -1580                                    | rs563011   | 25.3                       | 0.718                       | 2.8                        | 0.863                       |
| -386                                     | rs4937114  | 3.0                        | 0.243                       | 47.3                       | 0.394                       |
| -355                                     | rs10893493 | 11.0                       | 0.406                       | 4.1                        | 0.806                       |
| +177                                     | rs8177348  | 22.6                       | 0.318                       | 47.3                       | 0.394                       |
| +3977                                    | rs595022   | 22.3                       | 0.517                       | 2.6                        | 0.594                       |
| +6032                                    | rs646005   | 37.5                       | <b>0.006</b>                | 43.0                       | 0.508                       |
| +7685                                    | rs1893352  | 12.6                       | 0.063                       | 7.0                        | 0.559                       |
| R13W                                     | rs8177399  | 2.1                        | 0.965                       | 0.8                        | <b>0.001</b>                |
| S55N                                     | rs3802813  | 4.6                        | <b>0.002</b>                | 6.6                        | 0.347                       |
| Q101Q                                    | rs3802814  | 13.6                       | 0.532                       | 0.9                        | 0.095                       |
| S180L                                    | rs8177374  | 15.2                       | <b>0.013</b>                | 0.7                        | <b>0.025</b>                |
| A186A                                    | rs7932766  | 33.6                       | 0.822                       | 9.0                        | 0.197                       |
| V197I                                    | rs7932976  | 0                          | --                          | 2.4                        | 0.078                       |
| +10122                                   | rs609634   | 21.1                       | <b>0.047</b>                | 44.3                       | 0.348                       |
| +10610                                   | rs8177376  | 24.2                       | 0.497                       | 3.3                        | 0.516                       |
| +11347                                   | rs625413   | 21.3                       | 0.184                       | 06.9                       | 0.771                       |
| +13466                                   | rs8177382  | 12.0                       | 0.437                       | 12.3                       | 0.449                       |
| +13955                                   | rs8177385  | 0                          | --                          | 3.7                        | 0.495                       |
| +14472                                   | rs8177388  | 11.7                       | 0.280                       | 8.5                        | 0.843                       |
| +21162                                   | rs695029   | 17.9                       | 0.712                       | 12.1                       | 0.959                       |
| +35464                                   | rs611151   | 27.3                       | 0.394                       | 44.7                       | 0.282                       |
| +44402                                   | rs645852   | 27.8                       | 0.678                       | 16.9                       | 0.701                       |
| +60339                                   | rs240537   | 27.3                       | 0.381                       | 10.9                       | 0.107                       |
| +71446                                   | rs7937122  | 44.4                       | 0.419                       | 34.0                       | 0.379                       |

<sup>a</sup> *P* values are derived from 2x2 or 3x2 Chi-squared comparisons, depending on the presence or absence of mutant homozygotes. Significant *P* values are highlighted in bold.
