# Supplementary material
Source: PubMed Central journal article supplement (PMC2660299)
Supplement: NIHMS4175-supplement-4.pdf [file NIHMS4175-supplement-4.pdf]

## Supplementary Table 2

Supplementary Table 2. Genotype frequencies for each SNP in *TIRAP* genotyped in the UK IPD and Gambian malaria case-control study groups.

| Marker ID                               |                  |          | Population   |               |              |                   |
|-----------------------------------------|------------------|----------|--------------|---------------|--------------|-------------------|
| Position relative to the start of Exon1 | dbSNP ID in NCBI | Genotype | UK           |               | Gambian      |                   |
|                                         |                  |          | Controls (%) | IPD cases (%) | Controls (%) | Malaria cases (%) |
| -80708                                  | rs480153         | CC       | 63.1         | 68.7          | 74.8         | 76.1              |
|                                         |                  | CT       | 35.2         | 27.0          | 24.3         | 20.4              |
|                                         |                  | TT       | 1.7          | 4.3           | 0.9          | 3.5               |
| -68168                                  | rs588361         | AA       | 30.7         | 30.8          | 16.9         | 15.2              |
|                                         |                  | AG       | 52.5         | 52.3          | 50.8         | 50.6              |
|                                         |                  | GG       | 16.8         | 16.8          | 32.3         | 34.2              |
| -52070                                  | rs618176         | CC       | 64.0         | 69.3          | 82.5         | 88.7              |
|                                         |                  | CT       | 34.2         | 28.1          | 17.5         | 11.3              |
|                                         |                  | TT       | 1.8          | 2.6           | 0.0          | 0.0               |
| -29144                                  | rs670154         | GG       | 32.9         | 36.7          | 23.1         | 22.1              |
|                                         |                  | AG       | 50.0         | 36.7          | 46.2         | 47.1              |
|                                         |                  | AA       | 17.1         | 26.6          | 30.7         | 30.9              |
| -23852                                  | rs631023         | AA       | 54.1         | 52.8          | 12.1         | 9.0               |
|                                         |                  | AC       | 38.6         | 33.3          | 51.6         | 44.9              |
|                                         |                  | CC       | 7.3          | 13.9          | 36.3         | 46.1              |
| -18304                                  | rs638766         | CC       | 58.0         | 56.1          | 32.9         | 27.7              |
|                                         |                  | CT       | 35.6         | 36.0          | 46.6         | 47.9              |
|                                         |                  | TT       | 6.4          | 7.9           | 20.5         | 24.5              |
| -12534                                  | rs478309         | GG       | 57.9         | 54.5          | 34.3         | 29.6              |
|                                         |                  | AG       | 36.0         | 35.7          | 46.5         | 43.5              |
|                                         |                  | AA       | 6.1          | 9.8           | 19.2         | 26.9              |
| -5289                                   | rs594318         | CC       | 60.9         | 60.9          | 75.8         | 80.7              |
|                                         |                  | CG       | 35.3         | 36.4          | 22.0         | 18.2              |
|                                         |                  | GG       | 3.8          | 2.7           | 2.2          | 1.1               |
| -4570                                   | rs591163         | CC       | 58.4         | 55.9          | 35.1         | 33.0              |
|                                         |                  | CT       | 35.5         | 35.5          | 32.0         | 34.1              |
|                                         |                  | TT       | 6.1          | 8.6           | 33.0         | 33.0              |
| -1580                                   | rs563011         | TT       | 55.8         | 59.6          | 94.6         | 94.1              |
|                                         |                  | GT       | 35.5         | 33.9          | 5.4          | 5.9               |
|                                         |                  | GG       | 8.6          | 6.4           | 0.0          | 0.0               |
| -386                                    | rs4937114        | GG       | 94.0         | 94.9          | 91.7         | 92.6              |
|                                         |                  | GT       | 6.0          | 3.8           | 8.3          | 7.4               |
|                                         |                  | TT       | 0.0          | 1.3           | 0.0          | 0.0               |
| -355                                    | rs10893493       | AA       | 78.7         | 79.2          | 81.6         | 81.1              |
|                                         |                  | AG       | 20.9         | 18.9          | 15.8         | 18.9              |
|                                         |                  | GG       | 0.4          | 1.9           | 2.6          | 0.0               |
| +177                                    | rs8177348        | CC       | 59.9         | 62.6          | 31.7         | 27.2              |
|                                         |                  | CT       | 34.9         | 29.7          | 47.6         | 45.6              |
|                                         |                  | TT       | 5.2          | 7.7           | 20.7         | 27.2              |
| +3977                                   | rs595022         | GG       | 61.0         | 59.5          | 94.6         | 95.8              |
|                                         |                  | AG       | 33.4         | 36.7          | 4.3          | 4.2               |
|                                         |                  | AA       | 5.6          | 3.8           | 1.1          | 0.0               |
| +6032                                   | rs646005         | AA       | 40.2         | 43.3          | 28.4         | 22.3              |

|        |           |         |       |       |      |      |
|--------|-----------|---------|-------|-------|------|------|
|        |           | AG      | 45.8  | 35.1  | 33.7 | 39.3 |
|        |           | GG      | 14.0  | 21.6  | 37.9 | 38.4 |
| +7685  | rs1893352 | AA      | 75.1  | 81.9  | 86.0 | 86.8 |
|        |           | AG      | 22.7  | 15.9  | 14.0 | 12.6 |
|        |           | GG      | 2.2   | 2.2   | 0.0  | 0.6  |
| R13W   | rs8177399 | CC (RR) | 95.9  | 95.8  | 97.1 | 99.7 |
|        |           | CT (RW) | 4.1   | 4.2   | 2.4  | 0.3  |
|        |           | TT (WW) | 0.0   | 0.0   | 0.5  | 0.0  |
| S55N   | rs3802813 | GG (SS) | 93.2  | 85.4  | 90.4 | 86.6 |
|        |           | AG (SN) | 6.7   | 12.6  | 8.9  | 10.7 |
|        |           | AA (NN) | 0.2   | 2.0   | 0.7  | 2.7  |
| Q101Q  | rs3802814 | GG      | 73.9  | 77.6  | 97.0 | 98.7 |
|        |           | AG      | 24.2  | 20.1  | 3.0  | 1.2  |
|        |           | AA      | 1.9   | 2.3   | 0.0  | 0.1  |
| S180L  | rs8177374 | CC (SS) | 71.1  | 76.4  | 96.6 | 99.1 |
|        |           | CT (SL) | 26.9  | 18.8  | 3.4  | 0.9  |
|        |           | TT (LL) | 2.0   | 4.7   | 0.0  | 0.0  |
| A186A  | rs7932766 | CC      | 46.7  | 46.0  | 75.8 | 80.6 |
|        |           | CT      | 40.0  | 39.0  | 21.2 | 17.4 |
|        |           | TT      | 13.3  | 15.0  | 3.0  | 2.0  |
| V197I  | rs7932976 | GG (VV) | 100.0 | 100.0 | 97.5 | 94.4 |
|        |           | AG (IV) | 0.0   | 0.0   | 2.5  | 5.6  |
|        |           | AA (II) | 0.0   | 0.0   | 0.0  | 0.0  |
| +10122 | rs609634  | TT      | 61.8  | 64.6  | 41.6 | 32.6 |
|        |           | CT      | 34.5  | 27.8  | 32.6 | 42.1 |
|        |           | CC      | 3.6   | 7.6   | 25.8 | 25.3 |
| +10610 | rs8177376 | TT      | 57.2  | 64.1  | 94.4 | 92.5 |
|        |           | TG      | 34.5  | 28.2  | 5.6  | 7.5  |
|        |           | GG      | 8.2   | 7.8   | 0.0  | 0.0  |
| +11347 | rs625413  | CC      | 62.0  | 64.0  | 86.0 | 88.2 |
|        |           | CT      | 34.1  | 27.9  | 14.0 | 11.8 |
|        |           | TT      | 3.9   | 8.1   | 0.0  | 0.0  |
| +13466 | rs8177382 | CC      | 74.8  | 80.2  | 70.0 | 78.9 |
|        |           | CA      | 24.8  | 18.9  | 30.0 | 21.1 |
|        |           | AA      | 0.5   | 0.9   | 0.0  | 0.0  |
| +13955 | rs8177385 | CC      | 100.0 | 100.0 | 91.9 | 95.0 |
|        |           | CG      | 0.0   | 0.0   | 7.2  | 5.0  |
|        |           | GG      | 0.0   | 0.0   | 0.9  | 0.0  |
| +14472 | rs8177388 | CC      | 74.6  | 81.7  | 82.0 | 83.2 |
|        |           | CT      | 25.0  | 18.3  | 18.0 | 16.8 |
|        |           | TT      | 0.4   | 0     | 0.0  | 0.0  |
| +21162 | rs695029  | CC      | 66.8  | 66.7  | 77.5 | 78.7 |
|        |           | CT      | 30.1  | 31.7  | 20.6 | 19.3 |
|        |           | TT      | 3.1   | 1.7   | 1.9  | 2.0  |
| +35464 | rs611151  | CC      | 53.0  | 53.4  | 37.1 | 30.8 |
|        |           | CT      | 40.7  | 36.4  | 37.1 | 48.1 |
|        |           | TT      | 6.4   | 10.2  | 25.8 | 21.1 |
| +44402 | rs645852  | CC      | 52.6  | 57.7  | 69.5 | 70.8 |
|        |           | CG      | 37.0  | 34.6  | 25.6 | 25.5 |
|        |           | GG      | 10.4  | 7.7   | 4.8  | 3.7  |
| +60339 | rs240537  | GG      | 53.7  | 55.8  | 71.7 | 80.2 |
|        |           | GT      | 35.8  | 39.0  | 25.0 | 16.7 |
|        |           | TT      | 10.5  | 5.2   | 3.3  | 3.2  |
| +71446 | rs7937122 | CC      | 28.7  | 35.4  | 12.9 | 15.9 |
|        |           | CG      | 52.3  | 43.9  | 35.5 | 41.2 |
|        |           | GG      | 19.0  | 20.7  | 51.6 | 42.9 |
