# Supplementary material
Source: PubMed Central journal article supplement (PMC2660299)
Supplement: NIHMS4175-supplement-5.pdf [file NIHMS4175-supplement-5.pdf]

### Supplementary Information Table 3

Supplementary Information Table 3A. Primers used on the Sequenom-MassArray platform

| SNP_ID | PCR primers                                                       | Extension primers        |
|--------|-------------------------------------------------------------------|--------------------------|
| -80708 | ACGTTGGATGGTAGTTATGAGAGTGCTGCC<br>ACGTTGGATGCCTTCCTGAGACCTAAGAAC  | ATCTCTGTTGTGGAAGC        |
| -68168 | ACGTTGGATGCTGCAACTAGCAAATCACAG<br>ACGTTGGATGAAGGAACTGCGTTTATCAC   | ATCACAGTTTGAGGAGG        |
| -52070 | ACGTTGGATGAGAACAACCTCGCCCTTTTCC<br>ACGTTGGATGGTACTTTGAAACCTGTCAGC | CAGAGATAGAAGCATTACATTT   |
| -29144 | ACGTTGGATGGGCTAAAAGCAAGCCATGTG<br>ACGTTGGATGGATCGCCCCAAGAAATCAAG  | CACACAAGGGCCTGGAT        |
| -23852 | ACGTTGGATGTACAGCACAAATGCCAGGCAC<br>ACGTTGGATGGTCTCTGTAGATATAGAC   | GCACAATGCCAGGCACATAGCAAA |
| -18304 | ACGTTGGATGTCAGGTTTCTCTGGTTAAGG<br>ACGTTGGATGATCAGTTACTTGCCATGCTC  | CCTGCAACTACATCTGTTA      |
| -12534 | ACGTTGGATGATGGCACCTTATTTCTCCC<br>ACGTTGGATGAACTAGGCAAGGAAGTGGAC   | CTCCCACCACAGGGAACCTACA   |
| -5289  | ACGTTGGATGTGCCAGCCATATGGGTGCAA<br>ACGTTGGATGTTTGCTGCTTCCATCTTCCC  | GCCATATGGGTGCAATGGCCT    |
| -4570  | ACGTTGGATGGTGGTCCAAGGCCATTTTGTG<br>ACGTTGGATGTTAAGAAGAGCTGTGTGCC  | AAGGCCATTTTGTGCTGGCTGTAC |
| -1580  | ACGTTGGATGCTGGAGCCTGAAGAACCATC<br>ACGTTGGATGTGTAAGAGCCTGTGCTCTG   | GGCCTCGGGGAATTTTAC       |
| -386   | ACGTTGGATGCCATCTCTCCAAGCTTCATG<br>ACGTTGGATGCCTATTCGCCCATTTAATC   | CTCATTTGTATAAAAAGGAAAAAG |
| -355   | ACGTTGGATGTATGAACACCCCCCTTGAG<br>ACGTTGGATGACCTGGGTTTTGTTCTAGGC   | ACCCCCCTTGAGGGTGTTAGGA   |
| +177   | ACGTTGGATGAGAGTCCCGCCCCACCGA<br>ACGTTGGATGAAAGGTGAAGAAGGGAAGCG    | GGGGTGC GCGCCGCCTC       |
| +3977  | ACGTTGGATGACCTGGGTAATCCAGGAATC<br>ACGTTGGATGGTTACCTTCCGTGGCAAAAAG | GTTCTTAATCACAGCTGC       |
| +6032  | ACGTTGGATGCAGATGTCTTCTCTGGTTCC<br>ACGTTGGATGAACCATAGCAGCAAAGGAGG  | CCTGTACCCATTCCAAC        |
| +7685  | ACGTTGGATGGAATGAGAGCAGGGTAAGTG<br>ACGTTGGATGGTCTTGACCTCATGGAGCAG  | AGCCTTTGTGATTCTCTCTCTCT  |
| R13W   | ACGTTGGATGTCCACTCACCAGCCATCTTG<br>ACGTTGGATGCTATGGCATCATCGACCTCC  | CTAGAGGCTTCTTAGGCC       |
| S55N   | ACGTTGGATGAACTCCCCAGAAAGCACCTC<br>ACGTTGGATGACGTGACTGAGCTGAGGCTT  | GCCTACCTCACAGGACA        |
| Q101Q  | ACGTTGGATGAAGACTATGACGTCTGCGTG<br>ACGTTGGATGCTGCCTTCCAAGTAGGAGAC  | GGAAGACCTGGTGGCCGCCCA    |
| S180L  | ACGTTGGATGTCAGGTGGTAGGCAGCTCT<br>ACGTTGGATGAAGTACCAGATGCTGCAGGC   | CAGCTCTGCTGAGGCC         |
| A186A  | ACGTTGGATGCGACGTAGTACATGAATCGG<br>ACGTTGGATGTGCACCATCCCCCTGCTGTC  | ATCGGAGCTCAGGTGGGTA      |
| V197I  | ACGTTGGATGCACCTGAGCTCCGATTCATG<br>ACGTTGGATGCGCATGACAGCTTCTTTGAC  | AGCTCCGATTCATGTACTAC     |
| +10122 | ACGTTGGATGTGGTCAGTGAGGAAACCAAG<br>ACGTTGGATGGCTCCTGCACTTATTAACC   | AGCGGGTGAAGTAACTTG       |

|        |                                                                    |                        |
|--------|--------------------------------------------------------------------|------------------------|
| +10610 | ACGTTGGATGTGCAGACACTCAGTTGACAC<br>ACGTTGGATGCTGCATGGGTTTTCTGTTTC   | TCATGGGACCCCGGAAAT     |
| +11347 | ACGTTGGATGATCCATGGGCTTGTGATCTC<br>ACGTTGGATGAGGGAGCAAGTGAAGAGATG   | GTGATCTCAGGTGAAGGC     |
| +13466 | ACGTTGGATGGTGATTTCTGAGGTTTGCTTC<br>ACGTTGGATGTTACCAACTCTGAGCTACTC  | TGCTTCAAATGATCTTGTGG   |
| +13955 | ACGTTGGATGCCTCCCCTACATCTGTTTTTC<br>ACGTTGGATGAGAACAACAAAACCCAAAC   | CATATTTAGGTCTTTAATCCAC |
| +14472 | ACGTTGGATGGAAAATATGAAATGCTAGGG<br>ACGTTGGATGGTGTATTTTCAGTAAAGCTTTC | AAGAGGAGCTGACCAATGT    |
| +21162 | ACGTTGGATGTGATTGGTTCACTGCTTCCC<br>ACGTTGGATGGAGTCTGCGCGGACAAAAT    | CTGGTACCTTCCCGTGTAG    |
| +35464 | ACGTTGGATGCCAGGGATGGGTCAGATAAC<br>ACGTTGGATGCACCAACCTCTCGTTCTTTC   | TCAGATAACCGGACTTCGC    |
| +44402 | ACGTTGGATGGAAAACACGTTGGGAAACAC<br>ACGTTGGATGTGTAAGCGACTCGTGTTC     | GGAAACACGATACACAG      |
| +60339 | ACGTTGGATGTCAGGAACATCCTCCACCAG<br>ACGTTGGATGGGAACACACTGGAATCTGAG   | TTCACCAAACCACGTGGAA    |
| +71446 | ACGTTGGATGAATGCCAACAGCTTCTGCC<br>ACGTTGGATGAGTCTGCCTCCAAGTTGTTTC   | CGTGCAAGGAATGATTTAG    |

Supplementary Information Table 3B. Primers used for direct DNA sequencing

| Primer name   | Sequence                 |
|---------------|--------------------------|
| TIRAP_5'_1F   | CCATACTTGGCGCCGTC AAG    |
| TIRAP_5'_1R   | CAGCTCCGCTCTGCAAAACGC    |
| TIRAP_5'_2F   | GCGTTTTGCAGAGCGGAGCT G   |
| TIRAP_5'_2R   | GCTGCAGAGCCGCTGCAAAC     |
| TIRAP_5'_3F   | GTTTGCAGCGGCTCTGCAGC     |
| TIRAP_5'_3R   | CTCGGGCACAATCCGGCTGCG    |
| TIRAP_ex1_F   | CGCAGCCGGATTGTGCCCGAG    |
| TIRAP_ex1_R   | GATATCCACAACGCACTGAGC    |
| TIRAP_ex2_F   | GTGTGTCTAATAATACTTGC     |
| TIRAP_ex2_R   | CCTGCAGCCGTCAGCTCAG      |
| TIRAP_ex3_F   | CTGAGCTGACGGCTGCAGG      |
| TIRAP_ex3_R   | CACGACTGTGATTGGAGCTG     |
| TIRAP_ex4_F   | CAGCTCCAATCACAGTCGTG     |
| TIRAP_ex4_R   | ACAGCAGAGTCGCGAGTCCG     |
| TIRAP_int4_1F | CGGACTCGCGACTCTGCTGT     |
| TIRAP_int4_1R | GAGAAACACTGCTCAGGTCTGTGT |
| TIRAP_int4_2F | ACACAGACCTGAGCAGTGTTC    |
| TIRAP_int4_2R | CTAGATTGTCGCTAAATG       |
| TIRAP_int4_3F | CATTTAGCGACAATCTAG       |
| TIRAP_int4_3R | GTTACCAGGTGCCCTCTCACTG   |
| TIRAP_ex5_F   | AGCACCTCCAGCGATGCTTC     |
| TIRAP_ex5_R   | TACTGTAGCTGAATCCCCTTCC   |
| TIRAP_ex6_F   | GGAACGGGATTCAGCTACAGTA   |
| TIRAP_ex6_R   | TCACTCCCTATACCTCTTGTAC   |
| TIRAP_ex7_F   | GTGACAAGAGGTATAGGGAGTGA  |
| TIRAP_ex7_R   | GTGTCTTTAATGGCACCTAG     |
| TIRAP_ex8_F   | TCATTGACTGACTAGTCCAT     |
| TIRAP_ex8_R   | GCTTTACTGAAATACAC        |
